# Supplementary material
Source: Springer Nature journal article supplement (https://www.springermedizin.de/resource/supplementary/12913_2010_1430_MOESM2_ESM.pdf/9528110)
Supplement: MOESM2 [file 9528110]

**Humanistic and clinical outcomes,  
with additional humanistic data  
collected in the wait-listed control  
arm  
(Aims 1 and 2)**

**Costs (Aims 1 and 3)**

**ANALYSIS**

**Retrospective**

|

**Prospective**

**TIME  
(year)**

**-1**

**0**

**1**

**2**

**MINIMUM ENROLMENT**

**150 Surgical Cases  
200 Medically Treated Controls  
150 Wait-listed Controls**
